# Supplementary material for: Temporal Eating Patterns and Eating Windows among Adults with Overweight or Obesity
Source: MDPI journal article supplement (doi:10.3390/nu13124485), 2021-12-15
Supplement: s1 [file s1]

## Supplemental Material

**Table S1.** Eating patterns by study on adherent days (n=84).

| Variable                                                      | TEP (n=35)                         | TREAT (n=49)                       | p-value |
|---------------------------------------------------------------|------------------------------------|------------------------------------|---------|
| Eating Occasions (#/day)                                      | 3.9 [3.4-4.7]                      | 4.0 [3.1-4.5]                      | 0.706   |
| First Eating Occasion, (hh:mm)                                | 9:42 [8:36-10:17]                  | 9:40 [8:54-10:33]                  | 0.511   |
| Last Eating Occasion, (hh:mm)                                 | 19:55 [19:13-21:13]                | 19:34 [19:02-21:02]                | 0.376   |
| 95% Eating Duration, (h, min)                                 | 14h 02min<br>[12h 57min-15h 12min] | 14h 07min<br>[13h 00min-15h 20min] | 0.978   |
| Eating midpoint, (hh:mm)                                      | 14:30 [13:36-15:02]                | 14:13 [13:28-15:11]                | 0.602   |
| Within-person variability total daily eating occasions, (%CV) | 28.0 [21.1-34.3]                   | 30.0 [22.6-39.2]                   | 0.257   |
| Within-person variability First Eating Occasion, (h, min)     | 18.3 [13.6-23.1]                   | 20.7 [15.1-27.6]                   | 0.259   |
| Within-person variability Last Eating Occasion, (h,min)       | 8.6 [6.5-13.3]                     | 9.4 [7.5-11.5]                     | 0.824   |

TEP, temporal eating patterns; TREAT, time-restricted eating; %CV, percent coefficient of variation; significance \*p<0.05. Eating occasions were not normally distributed and therefore reported as median [interquartile range]. Eating pattern analyzes were generated off eating events that included adherent days (> 2 EO logged >5 h apart). First and last eating occasion, and eating midpoint are reported as local times (hh:mm).

**Table S2.** Eating patterns and within-person variability from all eating occasions (n=84).

| Variable                                                   | All (n=84)                         | Male (n=23)                        | Female (n=61)                      | p-value Male v Female | Weekday                             | Weekend                            | p-value week-day v week-end |
|------------------------------------------------------------|------------------------------------|------------------------------------|------------------------------------|-----------------------|-------------------------------------|------------------------------------|-----------------------------|
| Eating Occasions (#/day)                                   | 3.7 [2.5 -4.4]                     | 3.7 [2.8-4.4]                      | 3.7 [2.5-4.4]                      | 0.946                 | 3.7 [2.4 -4.3]                      | 3.0 [2.3-4.3]                      | 0.063                       |
| First Eating Occasion, (hh:mm)                             | 10:21<br>[09:03-11:10]             | 10:24<br>[08:57-11:27]             | 10:21<br>[09:16-11:03]             | 0.711                 | 10:13<br>[08:59-11:10]              | 10:15<br>[09:09-11:07]             | 0.46                        |
| Last Eating Occasion, (hh:mm)                              | 18:54<br>[17:45-19:59]             | 18:57<br>[18:27-20:48]             | 18:52<br>[17:37-19:39]             | 0.188                 | 18:48<br>[17:39-20:00]              | 19:13<br>[16:49-20:59]             | 0.792                       |
| 95% Eating Window, (h, min)                                | 14h 09min<br>[12h 57min-15h 16min] | 14h 08min<br>[12h 40min-15h 26min] | 14h 09min<br>[12h 57min-15h 04min] | 0.992                 | 13h 49min<br>[12h 39min -15h 09min] | 11h 51min<br>[10h 08min-13h 32min] | <0.0001*                    |
| Eating midpoint, (hh:mm)                                   | 14:26<br>[13:24-15:16]             | 14:28<br>[14:12 -15:19]            | 14:13<br>[13:22-15:05]             | 0.189                 | 14:32<br>[13:21-15:17]              | 14:06<br>[12:45-15:40]             | 0.622                       |
| Within-person variability eating occasion frequency, (%CV) | 38.0 [28.0-46.0]                   | 31.5 [23.8-41.2]                   | 40.0 [31.0-47.0]                   | <b>0.023</b>          | 36.0 [28.0-46.0]                    | 33.0 [20.0-43.0]                   | 0.15                        |
| Within-person variability First Eating                     | 5h 53min<br>[4h 17min-8h 05min]    | 5h 11min<br>[4h 13min-7h 55min]    | 5h 58min<br>[4h 18min-8h 05min]    | 0.452                 | 5h 48min<br>[4h 09min-8h 19min]     | 2h 58min<br>[1h 27min-5h 24min]    | <0.0001*                    |

|                                                                                                                                                                                                                                                                                                                         |                     |                     |                     |       |                     |                     |       |
|-------------------------------------------------------------------------------------------------------------------------------------------------------------------------------------------------------------------------------------------------------------------------------------------------------------------------|---------------------|---------------------|---------------------|-------|---------------------|---------------------|-------|
| Occasion, (h, min)                                                                                                                                                                                                                                                                                                      |                     |                     |                     |       |                     |                     |       |
| Within-person variability                                                                                                                                                                                                                                                                                               | 4h 03min            | 3h 12min            | 4h 14min            |       | 3h 48min            | 2h 44min            |       |
| Last Eating Occasion, (h, min)                                                                                                                                                                                                                                                                                          | [2h 39min-5h 31min] | [2h 24min-4h 33min] | [2h 44min-5h 44min] | 0.114 | [2h 06min-5h 38min] | [1h 10min-4h 34min] | 0.171 |
| %CV, percent coefficient of variation; significance *p<0.05. EOs were not normally distributed and therefore reported as median [interquartile range]. First and last eating occasions, as well as eating midpoint are reported as local times (hh:mm). Aggregate data from the TEP and NY-TREAT studies were included. |                     |                     |                     |       |                     |                     |       |

**Table S3.** Non-Parametric correlations between eating pattern variables and anthropometrics (n=85).

|                               | Body weight (kg)      | BMI (kg/m <sup>2</sup> ) | WC (cm)               | HC (cm)               | WHR                   |
|-------------------------------|-----------------------|--------------------------|-----------------------|-----------------------|-----------------------|
| Eating Occasions (#/day)      | r= 0.098<br>p=0.374   | r=0.125<br>p= 0.256      | r=0.164<br>p= 0.142   | r= 0.102<br>p= 0.360  | r= 0.068<br>p= 0.541  |
| First Eating Occasion (hr:mm) | r= -0.194<br>p= 0.077 | r= -0.157<br>p= 0.155    | r= -0.122<br>p= 0.274 | r= -0.055<br>p= 0.623 | r= -0.054<br>p= 0.630 |
| Last Eating Occasion (hr:mm)  | r= -0.083<br>p= 0.453 | r= -0.096<br>p= 0.386    | r= 0.042<br>p= 0.711  | r= -0.001<br>p= 0.990 | r= 0.052<br>p= 0.642  |
| 95% Eating Window (h, min)    | r= -0.010<br>p= 0.923 | r= -0.076<br>p= 0.490    | r= 0.065<br>p= 0.564  | r= -0.007<br>p= 0.950 | r=0.063<br>p= 0.572   |
| Eating Midpoint (hr:mm)       | r= -0.161<br>p= 0.145 | r= -0.115<br>p= 0.297    | r= 0.029<br>p= 0.799  | r= -0.031<br>p= 0.783 | r= 0.109<br>p= 0.329  |

BMI, body mass index; WC, waist circumference; HC, hip circumference; WHR, waist-to-hip ratio; Pearson correlations for normally distributed variables and Spearman for non-normally distributed variables; significance \*p<0.05.

**Table S4.** Correlations between eating pattern variables and glycemic outcomes in the TEP study (n=35).

|                               | HbA1c (%)             | Fasting Glucose (mg/dL) | Fasting Insulin (mIU/L) | HOMA-β                | HOMA-IR              |
|-------------------------------|-----------------------|-------------------------|-------------------------|-----------------------|----------------------|
| Eating Occasions (#/day)      | r= -0.117<br>p= 0.504 | r= -0.069<br>p= 0.695   | r= 0.295<br>p= 0.085    | r= 0.297<br>p= 0.018* | r= 0.277<br>p= 0.107 |
| First Eating Occasion (hh:mm) | r= -0.280<br>p= 0.104 | r= -0.077<br>p= 0.660   | r= 0.076<br>p= 0.664    | r= 0.021<br>p= 0.905  | r= 0.079<br>p= 0.651 |
| Last Eating Occasion (hh:mm)  | r= -0.193<br>p= 0.266 | r= 0.122<br>p= 0.484    | r= 0.305<br>p= 0.075    | r= 0.176<br>p= 0.309  | r= 0.322<br>p= 0.059 |
| 95% Eating Window (h, min)    | r= 0.122<br>p= 0.487  | r= 0.068<br>p= 0.698    | r= 0.114<br>p= 0.516    | r= 0.130<br>p= 0.455  | r= 0.116<br>p= 0.508 |
| Eating Midpoint (hr:mm)       | r= -0.077<br>p= 0.660 | r= -0.076<br>p= 0.663   | r= 0.291<br>p= 0.090    | r= 0.240<br>p= 0.165  | r= 0.230<br>p= 0.081 |

HbA1c, glycated hemoglobin; HOMA-β, homeostasis model assessment for beta-cell function; HOMA-IR, homeostasis model assessment for insulin resistance; significance \*p<0.05; Pearson correlations for normally distributed variables and Spearman for non-normally distributed variables

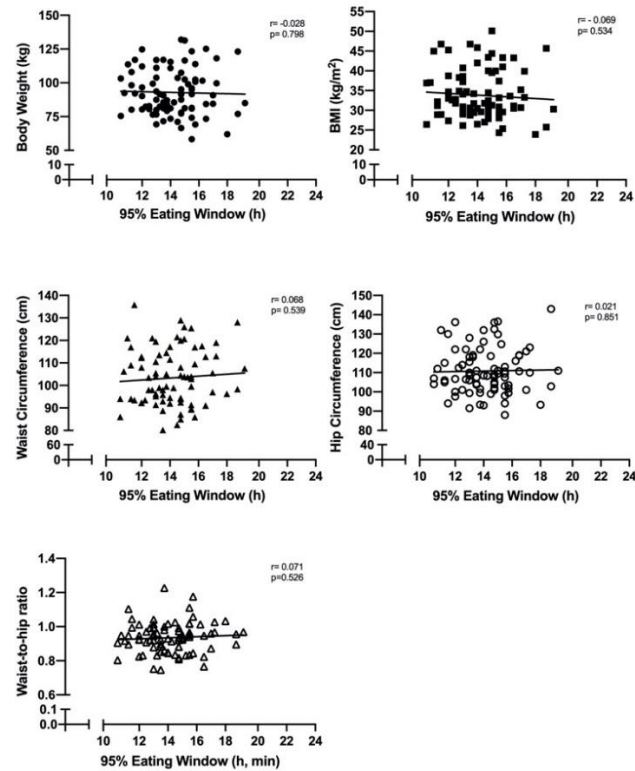

**Figure S1.** Associations Between the 95% Eating Window and Anthropometrics in Adults with Overweight and Obesity. There was no significant difference between the 95% eating window and body weight, BMI, waist and hip circumference and waist-to-hip ratio.  $p < 0.05$ ; significance in bold.

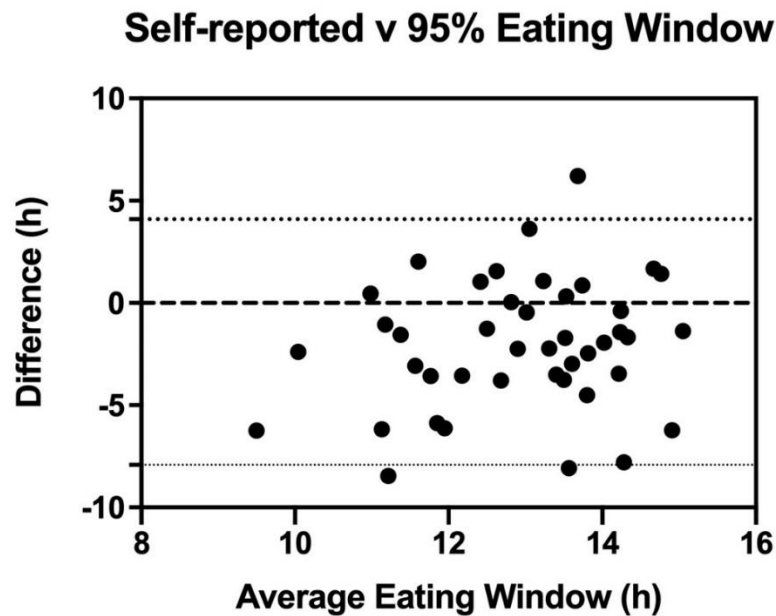

**Figure S2.** Bland Altman Plot analysis comparing the 95% eating window and self-reported eating window. The mean bias ( $-1\text{h } 50\text{min} \pm 2\text{h } 56\text{min}$ ) is represented by a dashed, bolded line and 95% limits of agreement ( $-7\text{h } 36\text{min}$  to  $3\text{h } 55\text{min}$ ) by short dashed lines.
